# Supplementary material for: Protective effects of isoquercitrin on streptozotocin‐induced neurotoxicity
Source: PubMed Central journal article supplement (PMC7521287; doi:10.1111/jcmm.15658), 2020-08-01
Supplement: JCMM-24-10458-s001.pdf [file JCMM-24-10458-s001.pdf]

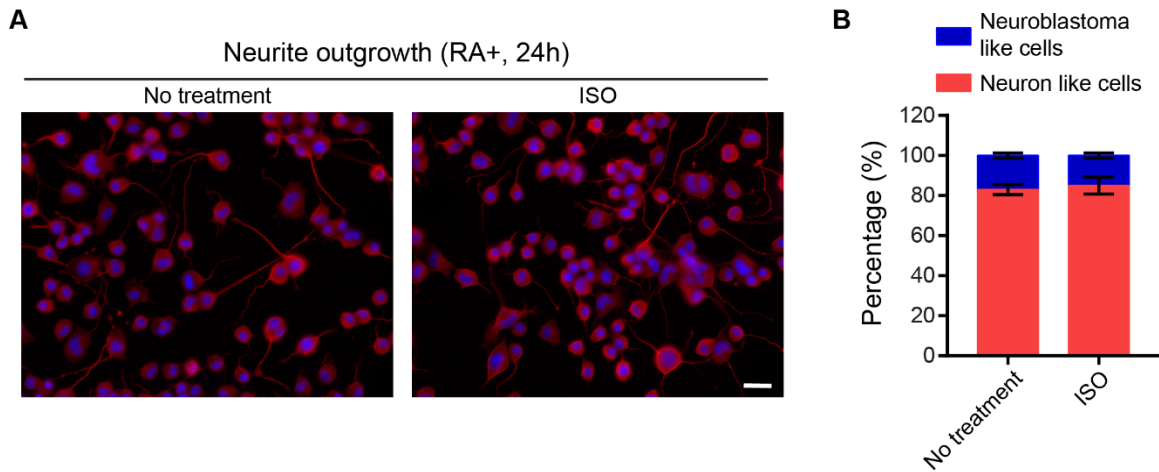

**Supplementary Fig.1. Isoquercitrin has no direct influence on N2a differentiation.** (A) Representative data of RA-induced differentiation and neurite outgrowth in N2a cells upon different treatment. N2a cells were treated with DMEM containing 0.1% serum and 5  $\mu$ M RA, with or without 5  $\mu$ M ISO for 24h. Cells were exposed to 20  $\mu$ M retinoic acid in the absence of serum for 24 hours. Cell membrane (red) was staining with Neurite Outgrowth Staining Kit and nucleus was stained with DAPI (blue). Scale bar: 15  $\mu$ m. (B) Quantitative analysis of the proportion of differentiated N2a cells. Cells with clear outgrowth of neurites were defined as neuron like cells. Data represent mean $\pm$ SD of three biological replicates. About 200 ( $\times$ 3) cells were counted for each sample.
